# Supplementary material for: Hypoxic pancreatic stellate cell-derived exosomal mirnas promote proliferation and invasion of pancreatic cancer through the PTEN/AKT pathway
Source: PubMed Central journal article supplement (PMC7993707; doi:10.18632/aging.202569), 2021-02-26
Supplement: aging-13-202569-s001.pdf [file aging-13-202569-s001.pdf]

## SUPPLEMENTARY FIGURE

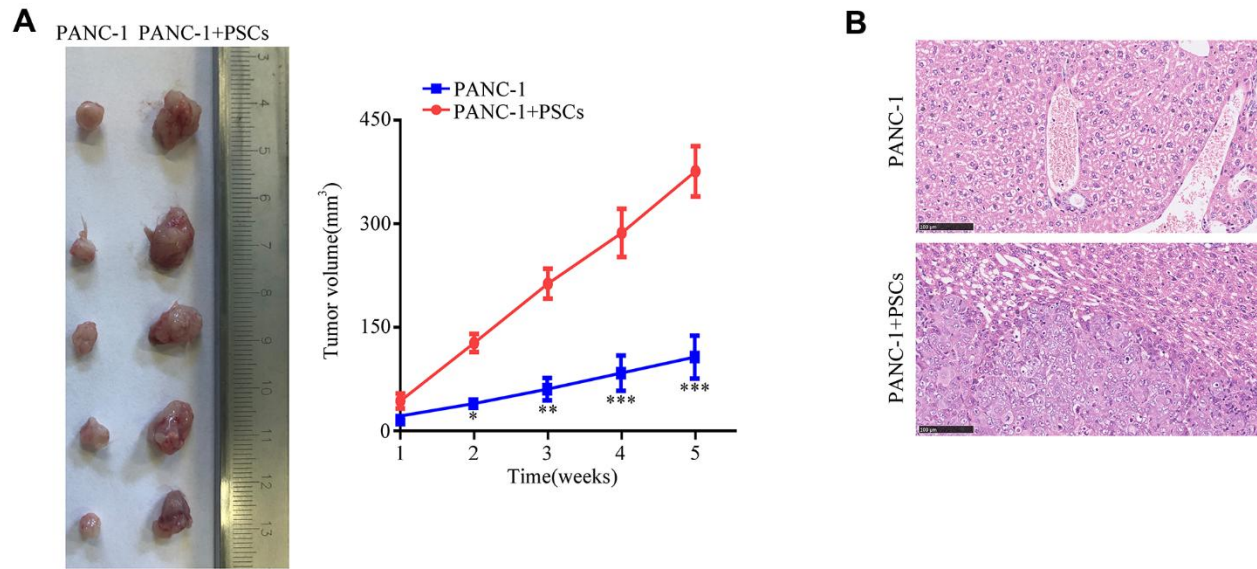

**Supplementary Figure 1. PSCs promote proliferation and metastasis of PC cells *in vivo*.** (A) Tumor volume measurements. Subcutaneous xenografts were produced in nude mice by injecting PANC-1 cells alone or in combination with PSCs. (B) Liver H&E staining images showing a higher number of metastatic foci following intrasplenic co-injection of PANC-1 and PSCs. \*P<0.05; \*\*P<0.01.
